# Supplementary material
Source: MDPI journal article supplement (https://www.mdpi.com/2073-4344/13/7/1133)
Supplement: s1 [file s1]

# Supplementary Materials

## Supplementary Materials

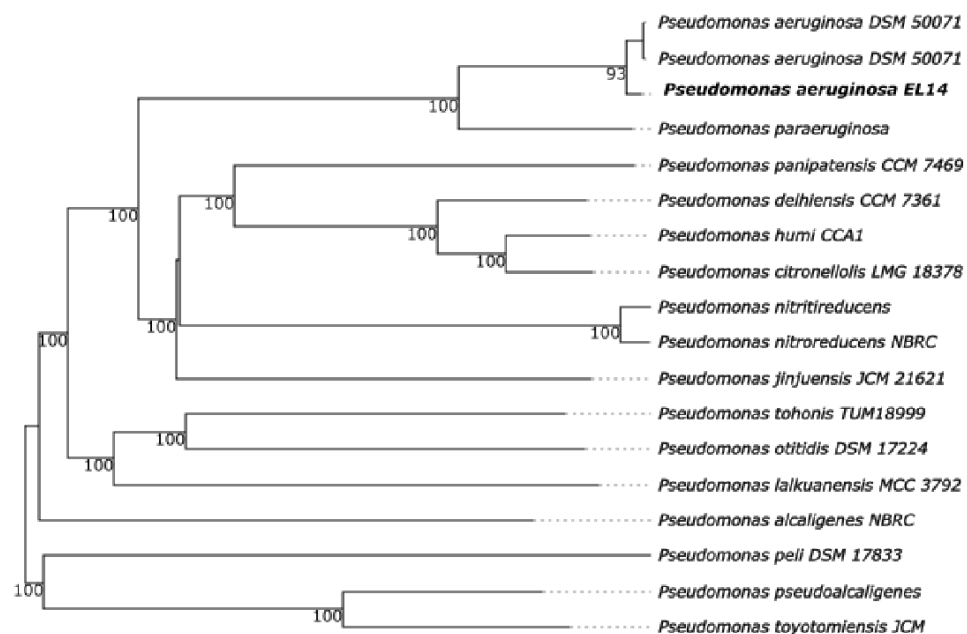

**Figure S1.** Taxonomic affiliation of strain EL14 inferred with TYGS (FastME 2.1.6.1) (Leftor and Gas-cuel, 2015) from GBDP (Genome Blast Distance Phylogeny) distances calculated from strain EL14 genome. The branch lengths are scaled in terms of GBDP distance formula d5. The numbers above branches are GBDP pseudo-bootstrap support values > 60 % from 100 replications, with an average branch support of 95.5 %. The tree was rooted at the midpoint.
